# Supplementary material
Source: Springer Nature journal article supplement (http://www.springermedizin.de/resource/supplementary/13075_2011_3850_MOESM2_ESM.pdf/9694858)

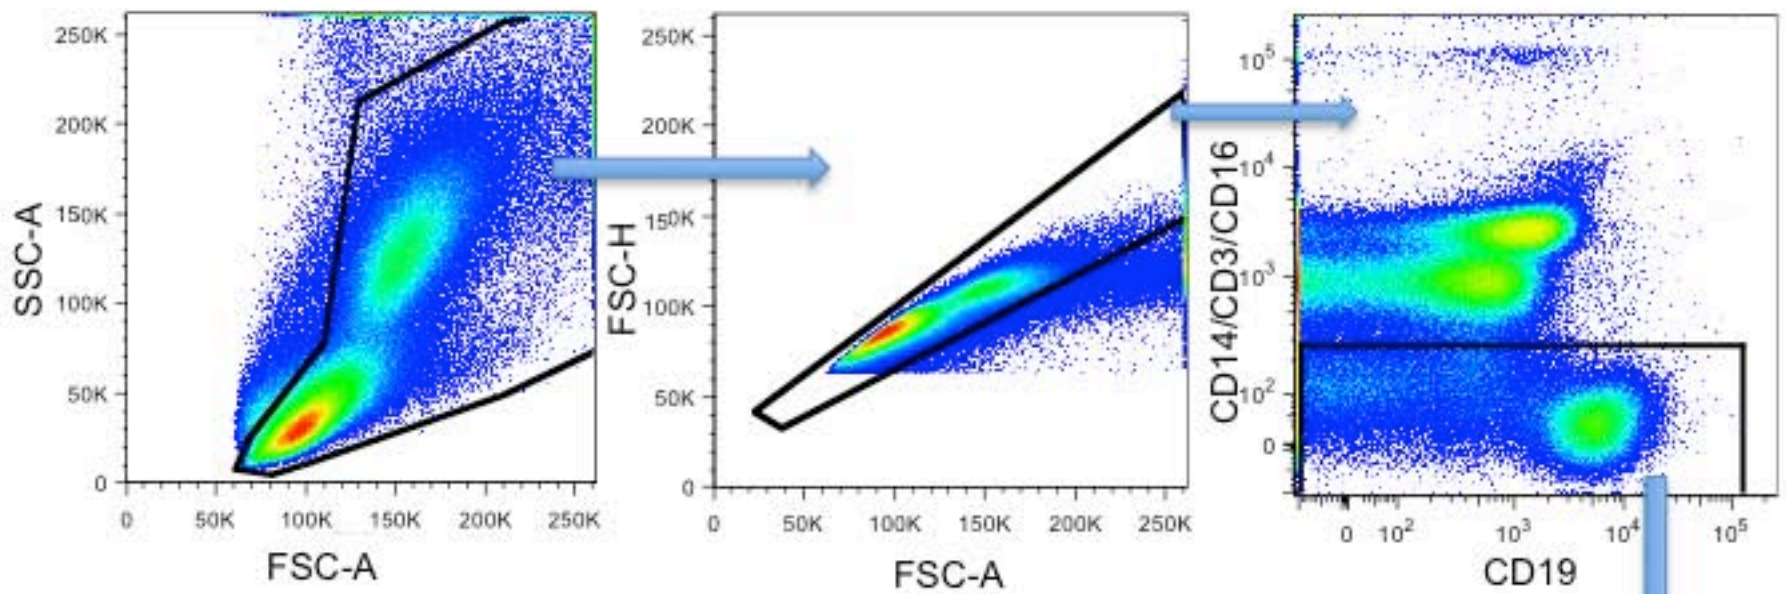

| subset               | phenotype                                                   |
|----------------------|-------------------------------------------------------------|
| transitional         | CD27-IgD <sup>+</sup> CD38 <sup>++</sup>                    |
| naïve                | CD27-IgD <sup>+</sup> CD38 <sup>+</sup>                     |
| double negative      | CD27-IgD <sup>-</sup>                                       |
| pre-switched memory  | CD27 <sup>+</sup> IgD <sup>+</sup>                          |
| post-switched memory | CD27 <sup>+</sup> IgD <sup>*</sup>                          |
| plasmablasts         | HLADR <sup>high</sup> CD27 <sup>++</sup> CD38 <sup>++</sup> |
| plasma cells         | HLADR <sup>low</sup> CD27 <sup>++</sup> CD38 <sup>++</sup>  |

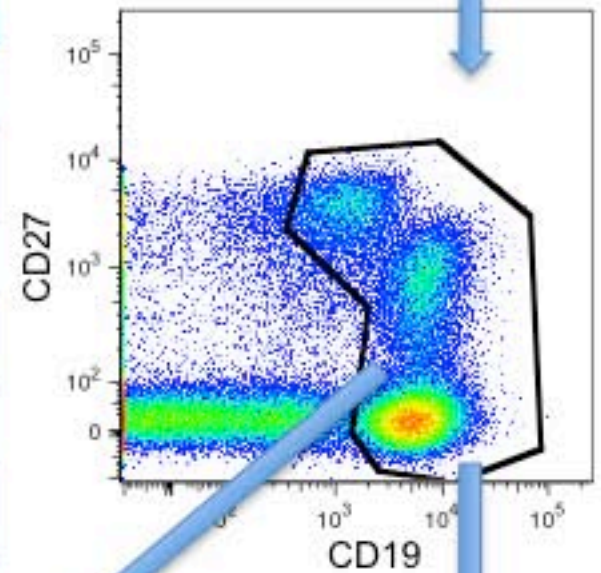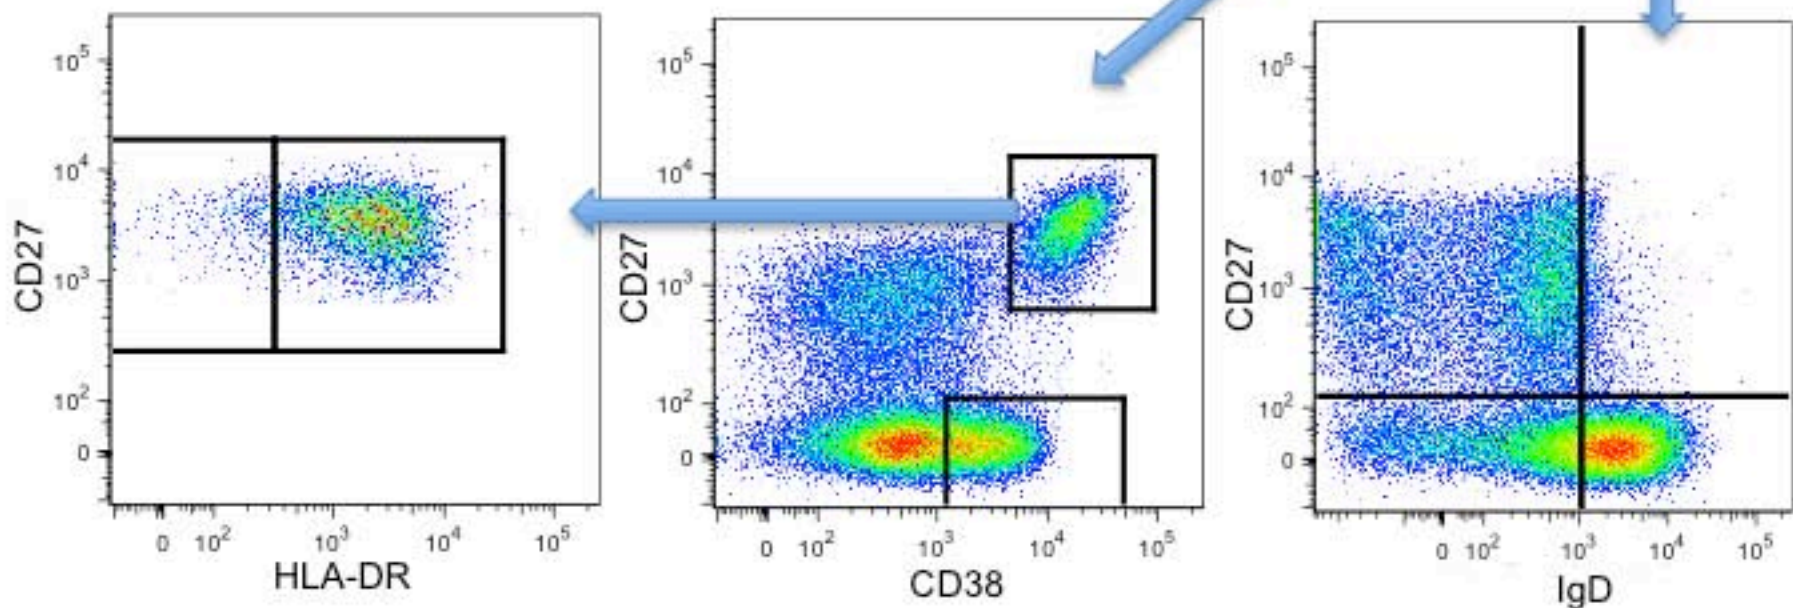

Supplement: MOESM2 [file 9694858]
